# Supplementary material for: Differential T cell reactivity to seasonal coronaviruses and SARS-CoV-2 in community and health care workers
Source: PubMed Central journal article supplement — medRxiv. 2021 Jan 15:2021.01.12.21249683. Preprint. [Version 1] doi: 10.1101/2021.01.12.21249683 (PMC7814840; doi:10.1101/2021.01.12.21249683), 2021-01-15
Supplement: NIHPP2021.01.12.21249683-supplement-1.pdf [file NIHPP2021.01.12.21249683-supplement-1.pdf]

# Supplementary information for:

## Differential T cell reactivity to seasonal coronaviruses and SARS-CoV-2 in community and health care workers

### Authors

Ricardo da Silva Antunes<sup>1,#</sup>, Suresh Pallikkuth<sup>2,#</sup>, Erin Williams<sup>3,#</sup>, Esther Dawen Yu<sup>1</sup>, Jose Mateus<sup>1</sup>, Lorenzo Quiambao<sup>1</sup>, Eric Wang<sup>1</sup>, Stephen A. Rawlings<sup>4</sup>, Daniel Stadlbauer<sup>5</sup>, Kaijun Jiang<sup>5</sup>, Fatima Amanat<sup>5,6</sup>, David Arnold<sup>3</sup>, David Andrews<sup>7</sup>, Irma Fuego<sup>3</sup>, Jennifer M. Dan<sup>1,8</sup>, Alba Grifoni<sup>1</sup>, Daniela Weiskopf<sup>1</sup>, Florian Krammer<sup>5</sup>, Shane Crotty<sup>1,8</sup>, Michael E. Hoffer<sup>3,9,‡</sup>, Savita G. Pahwa<sup>2,‡</sup> and Alessandro Sette<sup>1,8,‡,\*</sup>

### Affiliations:

<sup>1</sup> Center for Infectious Disease and Vaccine Research, La Jolla Institute for Immunology (LJI), La Jolla, CA 92037, USA.

<sup>2</sup> Department of Microbiology and Immunology, University of Miami Miller School of Medicine, Miami, FL 33136, USA.

<sup>3</sup> Department of Otolaryngology, University of Miami, Miller School of Medicine.

<sup>4</sup> Department of Medicine, Division of Infectious Diseases and Global Public Health, University of California, San Diego, La Jolla, CA 92037, USA.

<sup>5</sup> Department of Microbiology, Icahn School of Medicine at Mount Sinai, New York, NY.

<sup>6</sup> Graduate School of Biomedical Sciences, Icahn School of Medicine at Mount Sinai, New York, New York.

<sup>7</sup> Department of Pathology, University of Miami, Miller School of Medicine

<sup>8</sup> Department of Medicine, Division of Infectious Diseases and Global Public Health, University of California, San Diego (UCSD), La Jolla, CA 92037, USA.

<sup>9</sup> Department of Neurological Surgery, University of Miami, Miller School of Medicine.

# These authors contributed equally as co-first authors

‡ These authors contributed equally as co-last authors

\* Correspondence to: Alessandro Sette ([alex@lji.org](mailto:alex@lji.org))

## Supplementary Tables

### Supplementary Table 1a - List of megapools (MP) used in this study

| MP name    | Virus source | MP Type     | Peptide number | Reference                                |
|------------|--------------|-------------|----------------|------------------------------------------|
| CMV        | CMV          | Predicted   | 385            | Carrasco Pro et al., J Immun Res (2015)  |
| 229E ≤ 60% | HCoV-229E    | Predicted   | 205            | Sup. Table 1b                            |
| HKU1 ≤ 60% | HCoV-HKU1    | Predicted   | 272            | Sup. Table 1b                            |
| NL63 ≤ 60% | HCoV-NL63    | Predicted   | 252            | Sup. Table 1b                            |
| OC43 ≤ 60% | HCoV-OC43    | Predicted   | 258            | Sup. Table 1b                            |
| S          | SARS-CoV-2   | Overlapping | 253            | Grifoni et al., Cell (2020)              |
| CD4R       | SARS-CoV-2   | Predicted   | 221            | Grifoni et al., Cell (2020)              |
| CD8A       | SARS-CoV-2   | Predicted   | 314            | Grifoni et al., Cell Host Microbe (2020) |
| CD8B       | SARS-CoV-2   | Predicted   | 314            | Grifoni et al., Cell Host Microbe (2020) |

### Supplementary Table 1b - List of individual peptide sequences for each HCoV-CCC MP

| 229E (205 peptides) | HKU1 (272 peptides) | NL63 (252 peptides) | OC43 (258 peptides) |
|---------------------|---------------------|---------------------|---------------------|
| peptide 1           | peptide 1           | peptide 1           | peptide 1           |
| peptide 2           | peptide 2           | peptide 2           | peptide 2           |
| peptide 3           | peptide 3           | peptide 3           | peptide 3           |
| peptide ...         | peptide ...         | peptide ...         | peptide ...         |

### Supplementary Table 2. List of antibodies used in the study

| Antibody            | Fluorochrome | Clone     | Vendor         | Catalog number |
|---------------------|--------------|-----------|----------------|----------------|
| CD3                 | AF700        | UCHT1     | eBiosciences   | 56-0038-42     |
| CD4                 | APCef780     | RPA-T4    | eBiosciences   | 47-0049-42     |
| CD8                 | BV650        | RPA-T8    | Biolegend      | 301042         |
| CD137               | APC          | 4B4-1     | Biolegend      | 309810         |
| CD69                | PE           | FN50      | BD Biosciences | 555531         |
| OX40                | PE-Cy7       | Ber-ACT35 | Biolegend      | 350012         |
| CD38                | FITC         | HB-7      | Biolegend      | 356610         |
| HLA-DR              | PE-CF594     | G46-6     | BD Biosciences | 562304         |
| CD45RA              | eF450        | HI100     | Invitrogen     | 48-0458-42     |
| CCR7                | PerCP/Cy5.5  | G043H7    | Biolegend      | 353220         |
| CD14                | V500         | M5E2      | BD Biosciences | 561391         |
| CD19                | V500         | HIB19     | BD Biosciences | 561121         |
| Live/Dead Viability | eF506        | -         | Invitrogen     | 65-0866-18     |

## Supplementary Figures

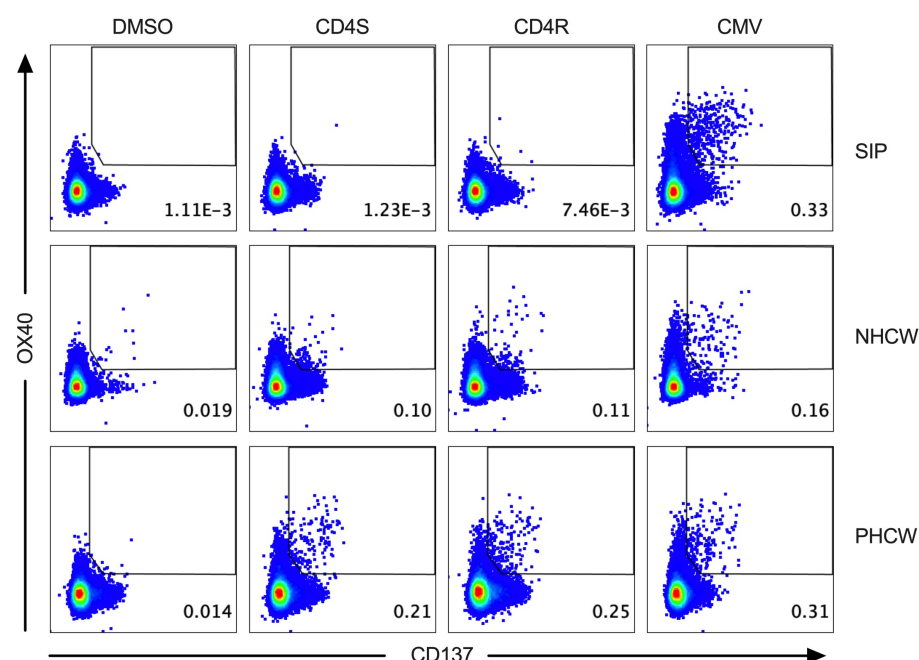

**Supplementary Figure 1. Representative flow cytometry gating of AIM+ (OX40/CD137) CD4+ T cell responses against SARS-CoV-2 and CMV across all the cohorts.**

Representative FACS plots, gated on total CD4+ T cells for the SARS-CoV-2-specific CD4+ T cells measured as percentage of AIM+ (OX40+CD137+) after stimulation of PBMCs with peptide pools encompassing spike (“S”) or the proteome without spike (“CD4R”) in addition to the DMSO negative control and the unrelated ubiquitous pathogen CMV across all the cohorts. Cell frequency for AIM+ cells in the several conditions is indicated

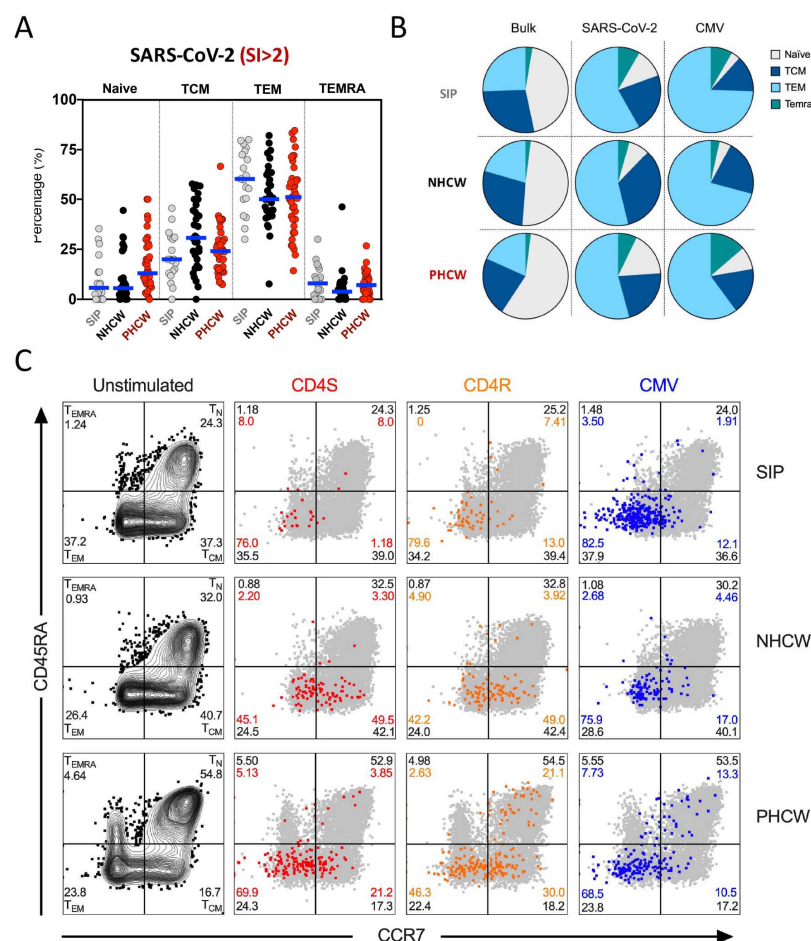

**Supplementary Figure 2. CD4+ T cell reactivity to SARS-CoV-2 epitopes is mediated by memory cells.** SARS-CoV-2-specific CD4+ T cell subsets (Tn: CD45RA+ CCR7+, Temra: CD45RA+ CCR7-, Tcm: CD45RA- CCR7+ and Tem: CD45RA- CCR7-) were measured after stimulation of PBMCs with peptide pools encompassing spike ("S") or the proteome without spike ("CD4R"). (A) Phenotype of antigen-specific CD4+ T cells (OX40+CD137+) responding to the indicated pools of SARS-CoV-2 and with SI>2 in each cohort. Each

dot represents the response of an individual subject to an individual pool and geometric mean for the 3 different groups is shown (B) Overall averages for total CD4+ (Bulk) or antigen-specific CD4+ T cell subsets for SARS-CoV-2 or CMV detected in the 3 different cohorts. (C) Representative FACS plots, gated on total CD4+ T cells (grey) for the SARS-CoV-2-specific CD4+ T cells (colored) measured as percentage of AIM+ (OX40+CD137+) after stimulation of PBMCs with peptide pools encompassing spike ("S") or the proteome without spike ("CD4R") in addition to the DMSO negative control and the unrelated ubiquitous pathogen CMV across all the cohorts. Cell frequency for each of the subsets is indicated in each quadrant for AIM+ cells (colored) or total ("bulk") CD4+ T cells (black).

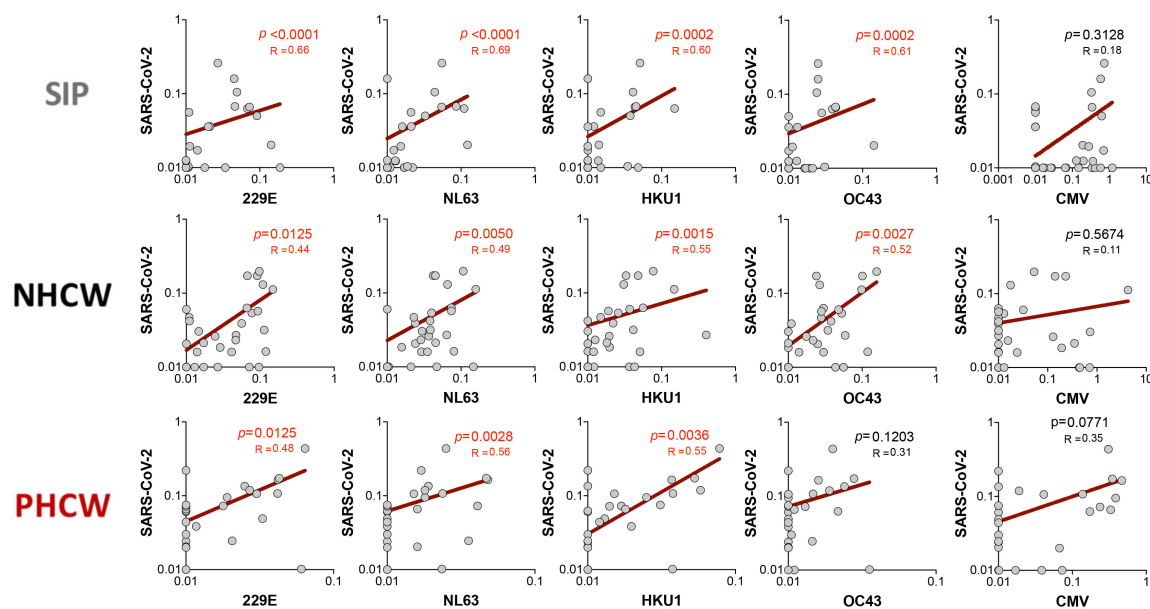

**Supplementary Figure 3. Correlation of SIP, NHCW and PHCW cohort responses to CCC and SARS-CoV-2.** Correlation between SARS-CoV-2-specific CD4+ T cells and each of the 4 CCC-specific CD4+ T cells (HCoV-229E, HCoV-NL63, HCoV-HKU1 and HCoV-OC43) as well as CMV. Total SARS-CoV-2 MP responses per donor were used in each case (“Spike” + “Non-spike” (CD4-total). Statistical comparisons were performed using Spearman correlations. Non-linear fit curve and P and R values are shown.

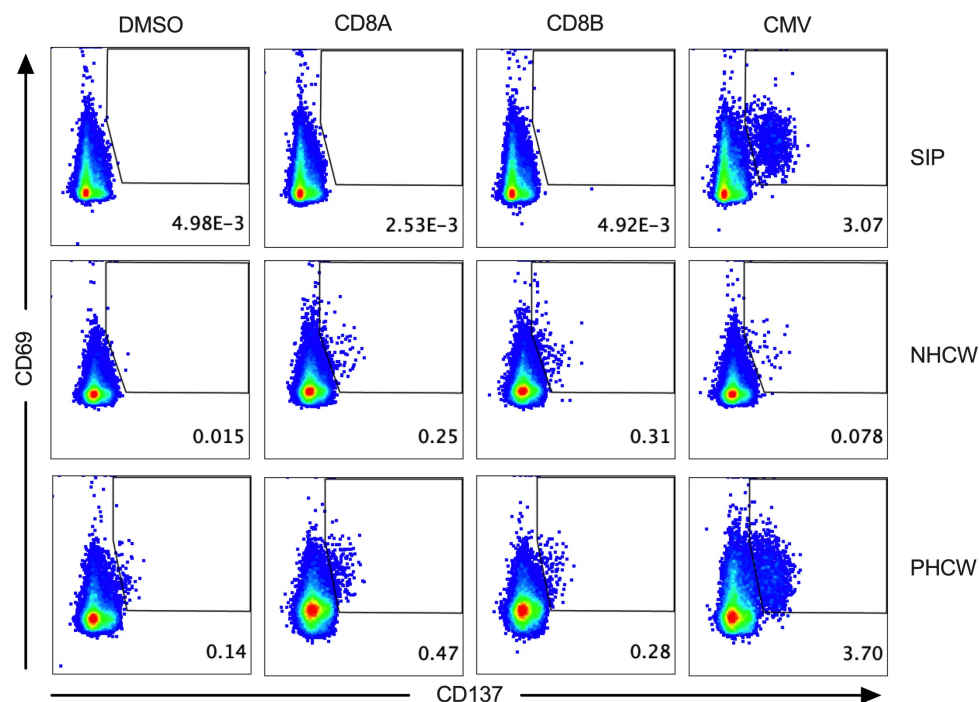

**Supplementary Figure 4. Representative flow cytometry gating of AIM+ (CD69/CD137) CD8+ T cell responses against SARS-CoV-2 and CMV across all the cohorts.** Representative FACS plots, gated on total CD8+ T cells for the SARS-CoV-2-specific CD8+ T cells measured as percentage of AIM+ (CD69+CD137+) after stimulation of PBMCs with class I MPs (CD8A, CD8B) in addition to the DMSO negative control and the unrelated ubiquitous pathogen CMV across all the cohorts. Cell frequency for AIM+ cells in the several conditions is indicated

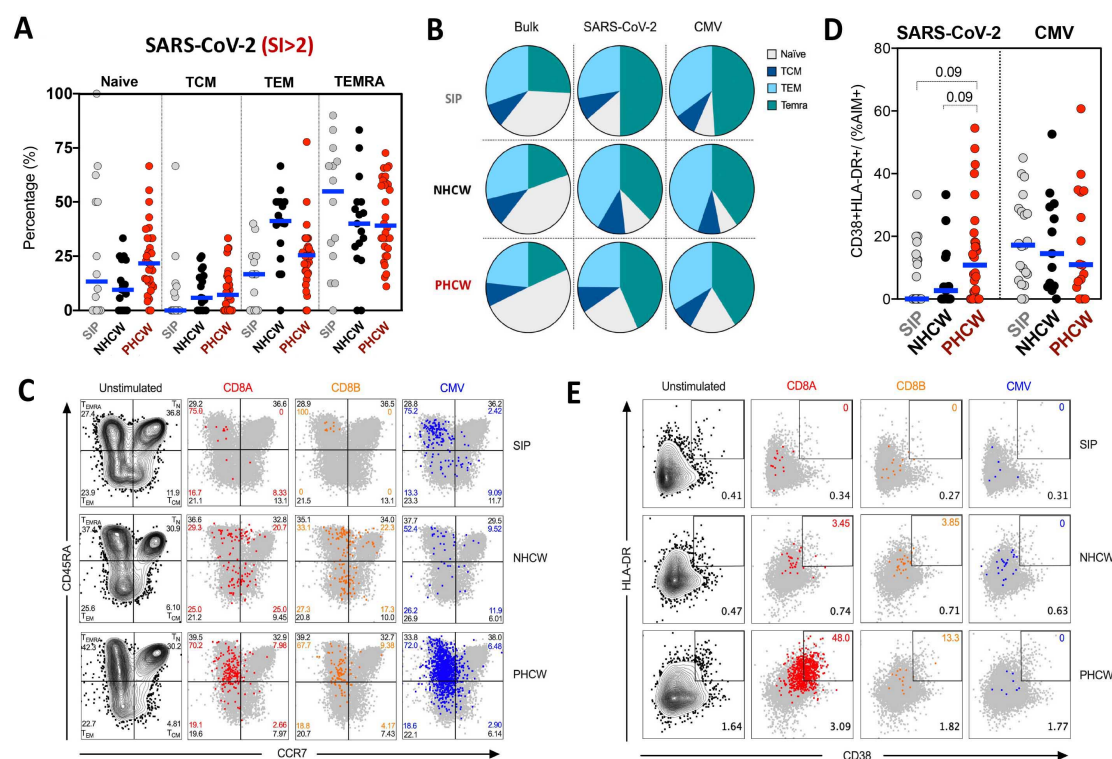

**Supplementary Figure 5. CD8+ T cell reactivity to SARS-CoV-2 epitopes is mediated by memory cells and associated with recent infection in PHCW.** SARS-CoV-2-specific CD8+ T cell subsets (Tn: CD45RA+ CCR7+, Temra: CD45RA+ CCR7-, Tcm: CD45RA- CCR7+ and Tem: CD45RA- CCR7-) were measured after stimulation of PBMCs with class I MPs (CD8A, CD8B). (A) Phenotype of antigen-specific CD4+ T cells (CD69+CD137+) responding to the indicated pools of SARS-CoV-2 and with SI>2 in each cohort. Each dot represents the response of an individual subject to an individual pool and geometric mean for the 3 different groups is shown (B) Overall averages for total CD8+ (Bulk) or antigen-specific CD8+ T cell subsets for SARS-CoV-2 or CMV detected in the 3 different cohorts. (C) Representative FACS plots, gated on total CD8+ T cells (grey) for the SARS-CoV-2-specific CD8+ T cells (colored) measured as percentage of AIM+ (CD69+CD137+) after stimulation of PBMCs with class I MPs (CD8A, CD8B) in addition to the DMSO negative control and the unrelated ubiquitous pathogen CMV across all the cohorts. Cell frequency for each of the subsets is indicated in each quadrant for AIM+ cells (colored) or total ("bulk") CD4+ T cells (black). (D) Recently activated SARS-CoV-2-specific CD8+ T cells were measured as percentage of CD38+/HLA-DR+ cells in AIM+ (CD69+CD137+) CD8+ T cells after stimulation of PBMCs

with class I MPs (CD8A, CD8B). Graphs show data for specific responses against SARS-CoV-2 and CMV responses with SI>2. Each dot represents the response of an individual subject to an individual pool. Geometric mean for the 3 different groups is shown. Non-parametric Kruskal-Wallis multiple comparison test was applied. P values are shown with  $p<0.05$  defined as statistical significant. (E) Representative FACS plots of HLA-DR/CD38+ cells in AIM+ (CD69+CD137+) CD8+ T cells (colored) overlapped with total HLA-DR/CD38 expression (grey) for all the cohorts in the different unstimulated or stimulated conditions. Cell frequency of HLA-DR/CD38+ in AIM+ cells or total CD8+ T cells is indicated on the top and bottom right corner respectively.

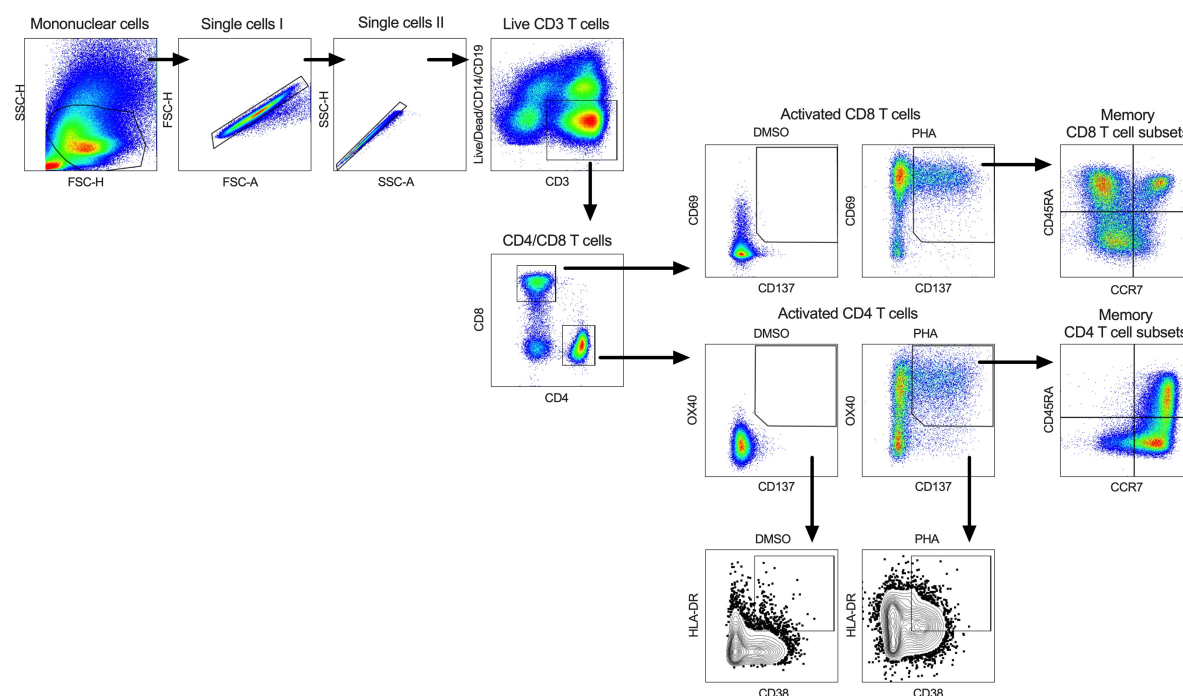

**Supplementary Figure 6. Gating strategy for CD4+ T cell and CD8+ T cell AIM assays used in this study.** Example of flow cytometry gating strategy. Briefly, mononuclear cells were gated out of all events followed by subsequent singlet gating. Live CD3+ T cells were gated out from dead cells, B cells and Monocytes. T cells were then divided as CD4+ or CD8+ and each population further subdivided into either AIM\_CD4+ (OX40/CD137) or AIM\_CD8+ (CD69/CD137) respectively or alternatively as HLA-DR/CD38. AIM+ cells were further mapped into memory subsets as a function of CCR7 and CD45RA expression (Tn: CD45RA+ CCR7+, Temra: CD45RA+ CCR7-, Tcm: CD45RA- CCR7+ and Tem: CD45RA- CCR7-).
